# Supplementary material for: Diffusion in Biological Media: A Comprehensive Numerical-Analytical Study via Surface Analysis and Diffusivities Calculation
Source: Research Square preprint supplement (doi:10.21203/rs.3.rs-4190565/v1), 2024-04-12
Supplement: Supplementary file 1 [file b97f94c0aafe9d09fc49f86b.pdf]

## Supplementary Information

### Appendices

#### Appendix A

The mathematical equations presented herewith are an integral part of the description that models the phenomenon of mass transfer, considering the first term of the infinite series.

$$W = \frac{1}{b} \sqrt{\frac{2}{\pi \lambda_1}} \left\{ \frac{\mathcal{D}_S}{\mathcal{D}_F} \left( \frac{r_0}{r_s - r_0} \right) \left[ \sin(\lambda_1) + \left( \frac{\lambda_1 \cos(\lambda_1) - \sin(\lambda_1)}{\lambda_1 \sin(\lambda_1) + \cos(\lambda_1)} \right) \cos(\lambda_1) \right] \right\} \quad (\text{A. 1})$$

$$\int_A^1 R^2 \Phi_{1(R)} dR = \sqrt{\frac{2}{\pi \lambda_1}} \left\{ \frac{1}{\lambda_1^2} [\sin(\lambda_1) - \sin(\lambda_1 A)] - \frac{1}{\lambda_1} [\cos(\lambda_1) - A \cos(\lambda_1 A)] + \frac{[\lambda_1 \cos(\lambda_1) - \sin(\lambda_1)]}{[\lambda_1 \sin(\lambda_1) + \cos(\lambda_1)]} \left[ \frac{1}{\lambda_1^2} [\cos(\lambda_1) - \cos(\lambda_1 A)] - \frac{1}{\lambda_1} [\sin(\lambda_1) - A \sin(\lambda_1 A)] \right] \right\} \quad (\text{A. 2})$$

$$b = \frac{1}{\pi \lambda_1} \left\{ \left[ (1 - A) + \frac{\sin(2\lambda_1 A) - \sin(2\lambda_1)}{2\lambda_1} \right] + \frac{2}{\lambda_1} \frac{[\lambda_1 \cos(\lambda_1) - \sin(\lambda_1)]}{[\lambda_1 \sin(\lambda_1) + \cos(\lambda_1)]} [\sin^2(\lambda_1) - \sin^2(\lambda_1 A)] + \frac{[\lambda_1 \cos(\lambda_1) - \sin(\lambda_1)]^2}{[\lambda_1 \sin(\lambda_1) + \cos(\lambda_1)]^2} \left[ (1 - A) - \frac{\sin(2\lambda_1 A) - \sin(2\lambda_1)}{2\lambda_1} \right] \right\} \quad (\text{A. 3})$$

$$A_0 = \frac{6}{(1 - A^3)} R_{\lambda_1}^2 \quad (\text{A. 4})$$

$$A_1 = \lambda_1^{2.0031} \quad (\text{A. 5})$$

wherein

$$R_{\lambda_1} = (B_3 C_3) - (D_3 E_3) + A \lambda_1 (B_3 E_3 + D_3 C_3) \quad (\text{A. 6})$$

In addition:

$$B_3 = \frac{\cos(\lambda_1 A)}{\lambda_1} \quad (\text{A. 7})$$

$$C_3 = \frac{1}{\lambda_1} [\sin(\lambda_1) - \sin(\lambda_1 A)] + [A \cos(\lambda_1 A) - \cos(\lambda_1)] \quad (\text{A. 8})$$

$$D_3 = \frac{\sin(\lambda_1 A)}{\lambda_1} \quad (\text{A. 9})$$

$$E_3 = \frac{1}{\lambda_1} [\cos(\lambda_1) - \cos(\lambda_1 A)] + [\sin(\lambda_1) - A \sin(\lambda_1 A)] \quad (\text{A. 10})$$

The preceding enables us to derive the mathematical formulas that facilitate the computation of the effective diffusion coefficients in the skin and flesh of cherries.

$$\mathcal{D}_F = \left| \ln \left( \frac{\alpha \beta}{\alpha + \beta} \right) \right| \frac{r_0^2}{(\lambda_1^3 - \lambda_1^2) t} \quad (\text{A. 11})$$

$$\mathcal{D}_S = \lambda_1 \tan(\lambda_1) \left| \ln \left( \frac{\alpha \beta}{\alpha + \beta} \right) \right| \frac{1}{(\lambda_1^3 - \lambda_1^2) t} (r_s r_0 - r_0^2) \quad (\text{A. 12})$$

#### Appendix B

Upon the development of the analytical expressions that model the molecular diffusion behaviour of the substances, the subsequent expressions elucidate each variable inherent in equations (A.11) and (A.12).

$$\alpha = N^{\circ 1} N^{\circ 2} N^{\circ 6} \quad (\text{B. 1})$$

$$\beta = N^{\circ 2} N^{\circ 3} N^{\circ 4} N^{\circ 5} N^{\circ 6} \quad (\text{B. 2})$$

It is described a mathematical equation that involves six functions, designated as  $N^{\circ 1}$  to  $N^{\circ 6}$ .

These functions are dependent on a variable  $\lambda_n$ , eigenvalues, to clarify,  $N^{\circ i} = f_i(\lambda_n)$ :

$$N^{\circ 1} = A_2 B_2 \quad (\text{B. 3})$$

$$N^{\circ 2} = C_2 - D_2 + E_2 (F_2 + G_2) \quad (\text{B. 4})$$

$$N^{\circ 3} = A_2 H_2 \quad (\text{B. 5})$$

$$N^{\circ 4} = I_2 J_2 \quad (\text{B. 6})$$

$$N^{\circ 5} = K_2 \quad (\text{B. 7})$$

$$N^{\circ 6} = M_2 \quad (\text{B. 8})$$

Where:

$$A_2 = \frac{3}{(1-A^3)} \quad (B.9)$$

$$B_2 = \frac{c_i}{b} \sqrt{\frac{2}{\pi\lambda_1}} \quad (B.10)$$

$$C_2 = \frac{1}{\lambda_1^2} [\sin(\lambda_1) - \sin(\lambda_1 A)] \quad (B.11)$$

$$D_2 = \frac{1}{\lambda_1} [\cos(\lambda_1) - A \cos(\lambda_1 A)] \quad (B.12)$$

$$E_2 = \frac{[\lambda_1 \cos(\lambda_1) - \sin(\lambda_1)]}{[\lambda_1 \sin(\lambda_1) + \cos(\lambda_1)]} \quad (B.13)$$

$$F_2 = \frac{1}{\lambda_1^2} [\cos(\lambda_1) - \cos(\lambda_1 A)] \quad (B.14)$$

$$G_2 = \frac{1}{\lambda_1} [\sin(\lambda_1) - A \sin(\lambda_1 A)] \quad (B.15)$$

$$H_2 = \frac{1}{b} \sqrt{\frac{2}{\pi\lambda_1}} \quad (B.16)$$

$$I_2 = \left[ \frac{\frac{D_S}{r_S - r_0}}{\frac{D_L}{r_0}} \right] = \lambda_1 \tan(\lambda_1) \quad (B.17)$$

$$J_2 = \sin(\lambda_1) + \frac{[\lambda_1 \cos(\lambda_1) - \sin(\lambda_1)]}{[\lambda_1 \sin(\lambda_1) + \cos(\lambda_1)]} \cos(\lambda_1) \quad (B.18)$$

$$K_2 = \frac{A_0}{\lambda_1^2 - A_1} \quad (B.19)$$

$$M_2 = \sqrt{\frac{2}{\pi\lambda_1}} \quad (B.20)$$
